# Supplementary material for: Carbon Catabolite Repression Regulates the Production of the Unique Volatile Sodorifen of Serratia plymuthica 4Rx13
Source: PubMed Central journal article supplement (PMC5742105; doi:10.3389/fmicb.2017.02522), 2017-12-19
Supplement: Data_Sheet_1.pdf [file Data_Sheet_1.pdf]

**Journal name:**

Frontiers in Microbiology

**Manuscript title:**

Carbon catabolite repression regulates the production of the unique volatile  
sodorifen of *Serratia plymuthica* 4Rx13

**Authors:**

Nancy Magnus<sup>1</sup>, Teresa Weise<sup>2</sup>, Birgit Piechulla<sup>1\*</sup>

**present addresses:**

1 University of Rostock, Institute for Biological Sciences, Albert-Einstein-Str. 3,  
18059 Rostock, Germany

2 EuroImmun, Medizinische Labordiagnostik AG, Seekamp 31, 23560 Lübeck

**\*corresponding author**

e-mail: [birgit.piechulla@uni-rostock.de](mailto:birgit.piechulla@uni-rostock.de);

phone: 0049 381 4986130

fax: 0049 381 4986132

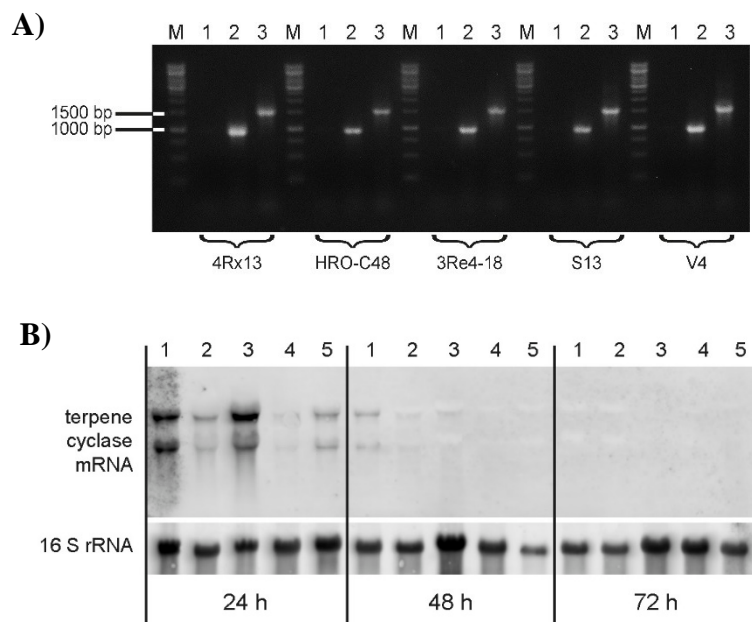

**Figure S1: Expression of sodorifen cluster in different producer strains.** Expression status of the sodorifen cluster genes was assessed in the different producer strains *Serratia plymuthica* 4Rx13, HRO-C48, 3Re4-18, S13 and V4 after 24 h cultivation in minimal medium + 55mM succinate. **A)** RT-PCR was performed with primers specific for the terpene cyclase gene of the sodorifen cluster to prove expression in all producing strains (lane 2). Lane 1: negative control (without reverse transcriptase), lane 3: positive control (16 S rRNA). For each bacterial isolate 1  $\mu$ g of RNA was used as a template. M = marker (GeneRuler 1 kb). **B)** Northern blot was performed to quantify expression levels of the terpene cyclase gene in the sodorifen producers after 24 h, 48 h and 72 h cultivation (1: *S.p.* 4Rx13, 2: *S.p.* HRO C48, 3: *S.p.* 3Re4-18, *S.p.* S13, 5: *S.p.* V4). Blotting was done with 5  $\mu$ g RNA each and DIG-dUTP-labelled probes specific for the terpene cyclase (upper panel) and the 16 S rRNA (lower panel) as a positive control. Finally, labelled RNA molecules were detected by fluorescence measurement for 1 min.

```

4Rx13      GGTATTTCCCTCTTACTGGCTCGCTATAGATCCATCCGATTTGACACCATGACGCAGGCGG 60
HRO-C48   GGTATTTCCCTCTTGCTGGCTCGCTATAGATCCATCCGATTTGACACCATGACGCAGGCGG 60
3Re4-18  GGTATTTCCCTCTTGCTGGCTCGCTATAGATCCATCCGATTTGACACCATGACGCAGGCGG 60
S13       GGTATTTCCCTCTTGCTGGCTCGCTATAGATCCATCCGATTTGACACCATGACGCAGGCGG 60
V4        GGTATTTCCCTCTTGCTGGCTCGCTATAGACCATCCGATTTGACACCATGACGCAGGCGG 60
*****

4Rx13      GAACAAGAAGTAAATGTTATGTTAACTGCAGCGACGCAACAATAACCCCACTCTGCAATCA 120
HRO-C48   GAACAAGAAGTAAATGTTATGTTAACTGCAGCGACGCAACAATAACCCCACTCTGCAATCA 120
3Re4-18  GAACAAGAAGTAAATGTTATGTTAACTGCAGCGACGCAACAATAACCCCACTCTGCAATCA 120
S13       GAACAAGAAGTAAATGTTATGTTAACTGCAGCGACGCAACAATAACCCCACTCTGCAATCA 120
V4        GAACAAGAAGTAAATGTTATGTTAACTGCAGCGACGCAACAATAACCCCACACTGCAATCA 120
*****

4Rx13      ACATGACCGAGACGCTTCATTACGGTCGG-GACAGAGGGTATCGGTGAGCACGTAATATC 179
HRO-C48   ACATGACCGAGACGCTTCATTACGGTCGG-GACAGAGGGTATCGGTGAGCACGTAACATC 179
3Re4-18  ACATGACCGAGACGCTTCATTACGGTCGG-GACAGAGGGTATCGGTGAGCACGTAACATC 179
S13       ACATGACCGAGACGCTTCATTACGGTCGG-GACAGAGGGTATCGGTGAGCACGTAACATC 179
V4        ACATGACCGAGACGCTTCATTACGGTCGGGGACAGAGGGTATCGGTGAGCACGTAACC 180
*****

4Rx13      ATTGGGCTAGCCGACCCCTTTGTTTCTGTAGCCGAAAACATCCATCGCCTGGCTTTAAACA 239
HRO-C48   ATTGGGCTAGCCGACCCTTTGTTTCTGTAGCCGAAAACATCCATCGCCTGGCTTTAAACA 239
3Re4-18  ATTGGGCTAGCCGACCCTTTGTTTCTGTAGCCGAAAACATCCATCGCCTGGCTTTAAACA 239
S13       ATTGGGCTAGCCGACCCTTTGTTTCTGTAGCCGAAAACATCCATCGCCTGGCTTTAAACA 239
V4        ATTGACTAGCCGACCCTTTGTTTCTGTAGCCAAAATATCATCACTGGCTTTGACA 240
*****

4Rx13      AAAAAATAGTTGCACCCTAGCAAAACTCCACATCGTTGAATTAACATTAAGTTAAACCAT 299
HRO-C48   AAAAAATAGTTGCACCCTAGCAAAACTCCACATCGTTGAATTAACATTAAGTTAAACCAT 299
3Re4-18  AAAAAATAGTTGCACCCTAGCAAAACTCCACATCGTTGAATTAACATTAAGTTAAACCAT 299
S13       AAAAAATAGTTGCACCCTAGCAAAACTCCACATCGTTGAATTAACATTAAGTTAAACCAT 299
V4        TAAAAATAGTTTCGCCATAGCAAAACTCCACATCGTTGAATTAACATTAAGTTAAACCAT 300
*****

4Rx13      AAGTTAAAAATATATCACTCGTACTTCATCATATAAATAGTCATCATCATGATTAAT 359
HRO-C48   AAGTTAAAAATATATCACAGCTGATACTTCATCATATAAATAGTCATCATCATGATTAAT 359
3Re4-18  AAGTTAAAAATATATCACAGCTGATACTTCATCATATAAATAGTCATCATCATGATTAAT 359
S13       AAGTTAAAAATATATCACAGCTGATACTTCATCATATAAATAGTCATCATCATGATTAAT 359
V4        AAGTTAAAAATATATCACAGCTGATACTTCATCATATAAATAGTCATCATCATGATTAAT 360
*****

4Rx13      TTATTTTCTTAAAAACCGTCATTAATAAATTTGACAAATGAAAGAAATTCGCTTTTAA 419
HRO-C48   TTATTTTTATAAAAGCCATCATTAATAAATTTGACAAATGAAAGAAATGCGTTTAA 419
3Re4-18  TTATTTTAATAAAAGCCATCATTAATAAATTTGACAAATGAAAGAAATGCGTTTAA 419
S13       TTATTTTAATAAAAGCCATCATTAATAAATTTGACAAATGAAAGAAATGCGTTTAA 419
V4        TTATTTTCTAAAAACCATCATTAATAAAGTTTGACAAATGAAAAAATGCGTTTAA 420
*****

4Rx13      TTAAATTCATTGATTAATAAACCCCAATGCTCAATCGAATTTATTCGGGGGTCACCTC 479
HRO-C48   TTAAATTCATTGATCAAAAAACCCCAATGCTCAATCGAATTTATTCGGGGGTCACCTC 479
3Re4-18  TTAAATTCATTGATCAAAAAACCCCAATGCTCAATCGAATTTATTCGGGGGTCACCTC 479
S13       TTAAATTCATTGATCAAAAAACCCCAATGCTCAATCGAATTTATTCGGGGGTCACCTC 479
V4        TTAAATTCATTGATCAAAAAACCCTATCTGCAATCGAATTTATTCGGGGGTCACCTC 480
*****

4Rx13      G----- 480
HRO-C48   GTGGAAGAA 488
3Re4-18  ----- 479
S13       GTGGAAGAA 488
V4        ----- 480

```

**Figure S2: Analysis of the 5'-UTR in the sodorifen producer strains *Serratia plymuthica*. 4Rx13, HRO-C48, 3Re4-18, S13 and V4.** Alignment was performed with the Clustal Omega online software (Sievers et. al. 2011). Red letters indicate differences in the sodorifen producing strains in comparison to *S. p.* 4Rx13. Asterisks represent matches between all sequences and dashes deletions.

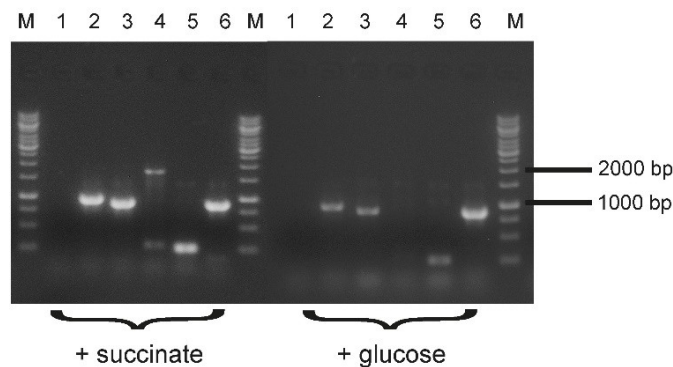

**Figure S3: Expression of the sodorifen cluster depending on the carbon source.** Expression status of the sodorifen cluster genes was assessed in *Serratia plymuthica* 4Rx13 after 24 h cultivation in minimal medium supplemented with either 55 mM succinate or glucose. RT-PCR was performed with primers specific for the terpene cyclase (lane 2), methyltransferase (lane 3), DOXP synthase (lane 4) and IPP isomerase (lane 5) of the sodorifen cluster. Lane 1: negative control (without reverse transcriptase), lane 6: positive control (GAPDH). For each cultivation condition, 1 µg of RNA was used as a template. M = marker (GeneRuler® 1kb).

**A)**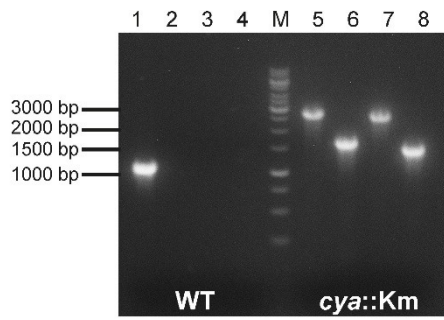**B)**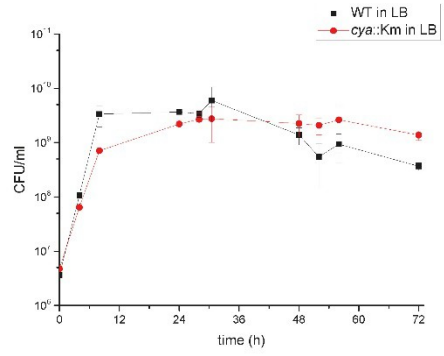**C)**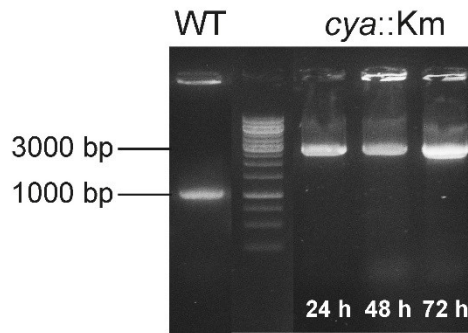**D)**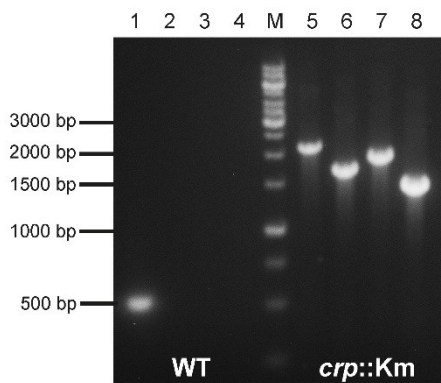**E)**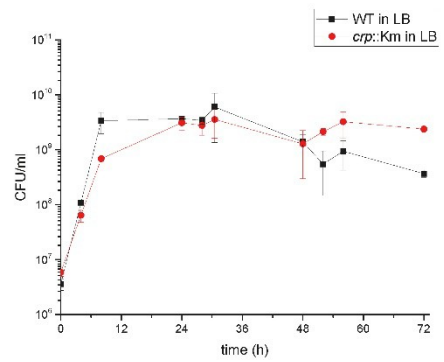**F)**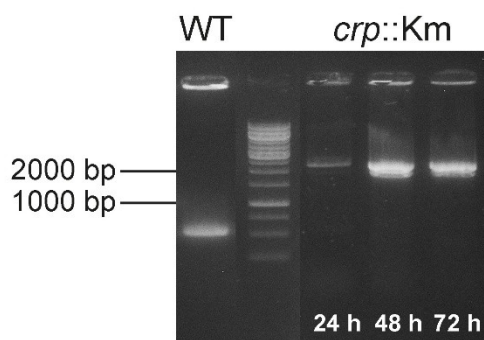**G)**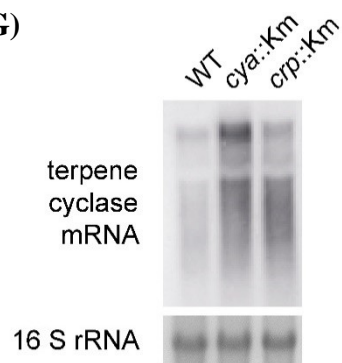

**Figure S4: Characterization of the *cya::Km* and *crp::Km* insertion mutants of *Serratia plymuthica* 4Rx13. A)-C) Characterization of *cya::Km*. A) Verification of correct insertion of the functional cassette by PCR. In lanes 1-4 results for the *S. p.* 4Rx13 wildtype are shown and in lanes 5-8 for the *cya* mutant. Lanes 1 & 5 represent amplification products with gene-specific primers for the *cya* gene (1.1 kb for the WT; 2.7 kb for *cya::Km*). Lanes 4 & 8 depict amplification products of primers specific for the functional cassette (1.4 kb). Lanes 2 & 6 show PCR products after amplification with gene- and cassette-specific primers (1.6 kb; left border), as well as lanes 3 & 7 (right border; 2.5 kb). M = marker (GeneRuler® 1 kb). B) Growth comparison of *S. p.* 4Rx13 WT and *cya::Km* in complex medium (NB). The living cell number (CFU/ml) was determined periodically for up to 72 h. Error bars represent standard deviation (n=3). C) Stability of the mutation of *cya* in *S. p.* 4Rx13 was determined in 24 h intervals for up to 72 h of cultivation in complex medium (LB) using PCR. D)-F) Characterization of *crp::Km*. D) Verification of correct insertion of the functional cassette by PCR. In lanes 1-4 results for the *S. p.* 4Rx13 wildtype are shown and in lanes 5-8 for the *crp* mutant. Lanes 1 & 5 represent amplification products with gene-specific primers for the *crp* gene (537 bp for the WT; 2.15 kb for *crp::Km*). Lanes 4 & 8 depict amplification products of primers specific for the functional cassette (1.4 kb). Lanes 2 & 6 show PCR products after amplification with gene- and cassette-specific primers (1.68 kb; left border), as well as lanes 3 & 7 (right border; 1.89 kb). M = marker (GeneRuler® 1 kb). E) Growth comparison of *S. p.* 4Rx13 WT and *crp::Km* in complex medium (NB). The living cell number (CFU/ml) was determined periodically for up to 72 h. Error bars represent standard deviation (n=3). F) Stability of the mutation of *crp* in *S. ply.* 4Rx13 was determined in 24 h intervals for up to 72 h of cultivation in complex medium (NB) using PCR. G) Expression of the terpene cyclase in *S. p.* 4Rx13 *cya::Km* and *crp::Km* in comparison to the wild type. Northern blot of *S. p.* 4Rx13 wild type, *cya::Km* and *crp::Km* was performed after 24 h cultivation in complex medium (NB). Detection of the terpene cyclase mRNA (upper panel) was conducted using hybridization with a DIG-labelled probe followed by fluorescence measurement for 1 min. 16 S rRNA detection (lower panel) was performed on the same blot as a positive control.**

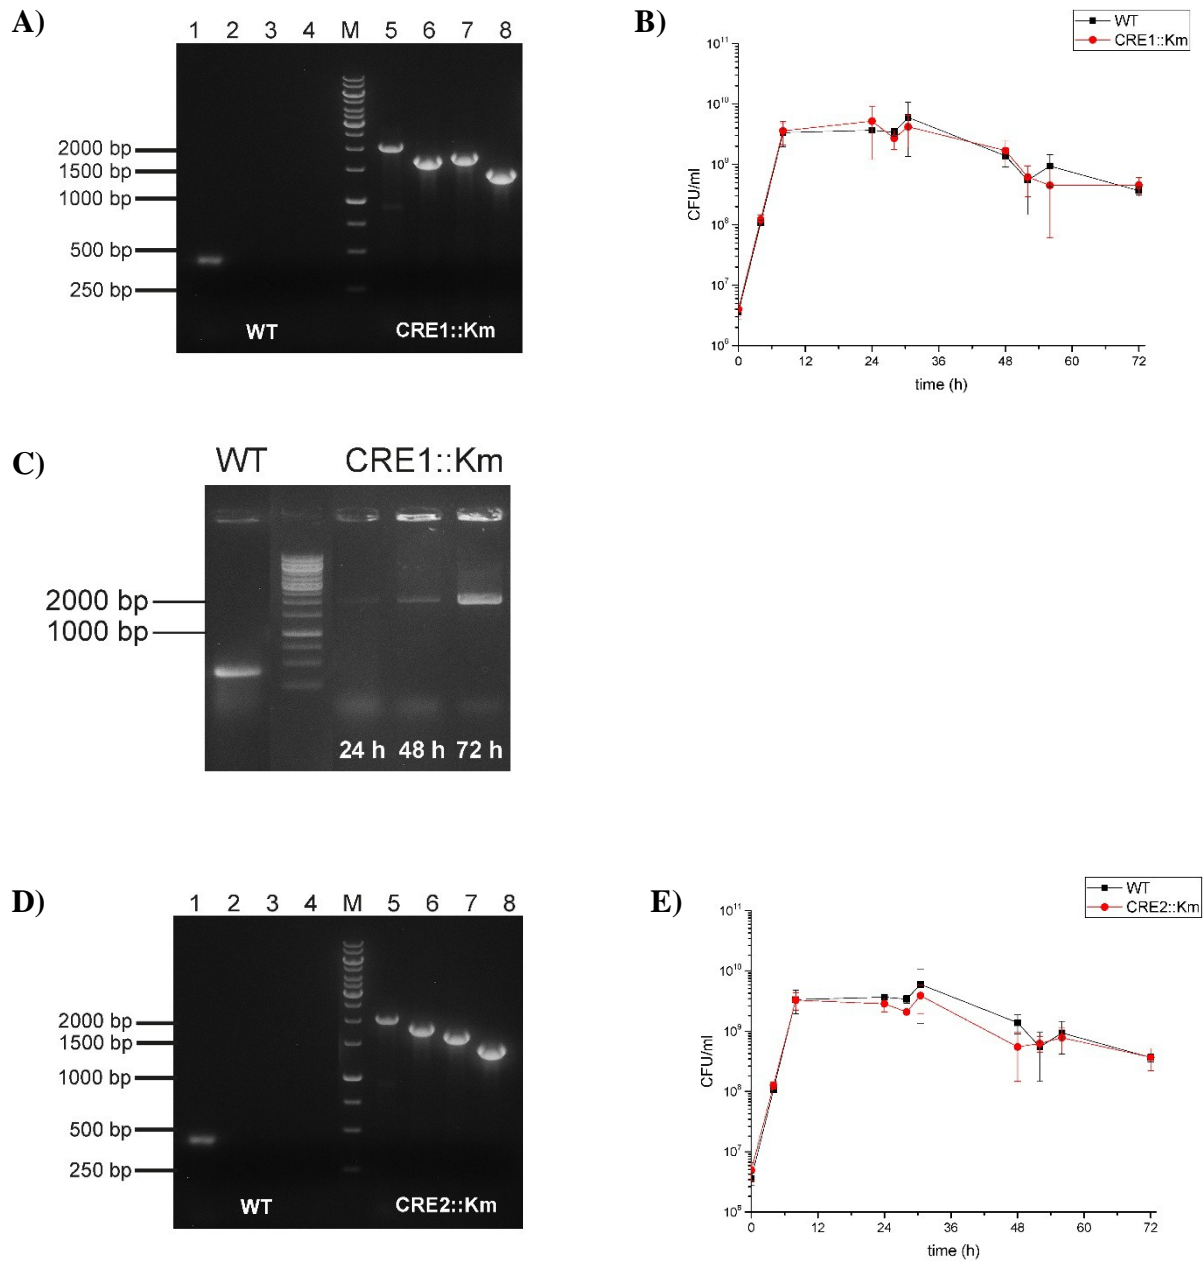

**Figure S5: Characterization of the CRE1::Km and CRE2::Km deletion mutants of *Serratia plymuthica* 4Rx13.** **A)-C)** Characterization of CRE1::Km. **A)** Verification of correct insertion of the functional cassette by PCR. In lanes 1-4 results for the *S. p.* 4Rx13 wildtype are shown and in lanes 5-8 for the CRE1 mutant. Lanes 1 & 5 represent amplification products with specific primers for the 5'-UTR of the sodorifen cluster (434 bp for the WT; 2.1 kb for CRE1::Km). Lanes 4 & 8 depict amplification products of primers specific for the functional cassette (1.4 kb). Lanes 2 & 6 show PCR products after amplification with 5'-UTR- and cassette-specific primers (1.68 kb; left border), as well as lanes 3 & 7 (right border; 1.8 kb). M = marker (GeneRuler® 1 kb). **B)** Growth comparison of *S. p.* 4Rx13 WT and CRE1::Km in complex medium (NB). The living cell number (CFU/ml) was determined periodically for up to 72 h. Error bars represent standard deviation (n=3). **C)** Stability of the deletion of CRE1 in *S. p.* 4Rx13 was determined in 24 h intervals for up to 72 h of cultivation in complex medium (NB) using PCR. **D)-E)** Characterization of CRE2::Km. **D)** Verification of correct insertion of the functional cassette by PCR. In lanes 1-4 results for the *S. p.* 4Rx13 wildtype are shown and in lanes 5- 8 for the CRE2 mutant. Lanes 1 & 5 represent amplification products with specific primers for the 5'- UTR of the sodorifen cluster (434 bp for the WT; 2.1 kb for CRE2::Km). Lanes 4 & 8 depict amplification products of primers specific for the functional cassette (1.4 kb). Lanes 2 & 6 show PCR products after amplification with 5'-UTR- and cassette-specific primers (1.8 kb; left border), as well as lanes 3 & 7 (right border; 1.66 kb). M = marker (GeneRuler® 1 kb). **E)** Growth comparison of *S. p.* 4Rx13 WT and CRE2::Km in complex medium (NB). The living cell number (CFU/ml) was determined periodically for up to 72 h. Error bars depict standard deviation (n=3).

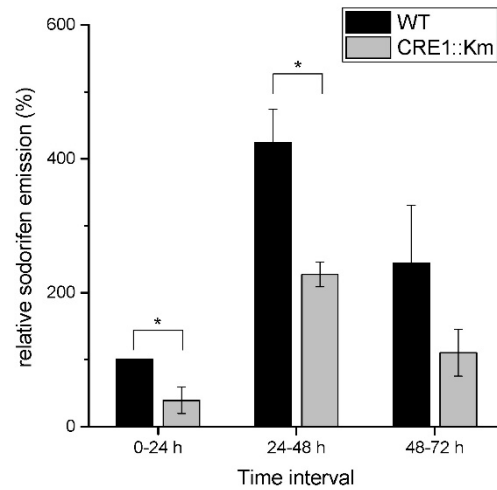

**Figure S6: Relative sodorifen emission of *S. ply.* CRE1::Km in complex medium.** Sodorifen emission of *S. ply.* 4Rx13 wild type and CRE1::Km during cultivation in complex medium (NBII) was determined using the closed VOC collection system (modified after Kai et. al. 2010) with subsequent GC/MS analysis. Relative sodorifen emission was calculated by correlating the living cell number (CFU/ml) to the sodorifen amount measured. As a reference, wild type emission until 24 h cultivation was used (100 %). Error bars indicate standard deviation (n=3). \* $p < 0.05$

**Table S1: Primer sequences and annealing temperatures.** Underlined parts of primers represent the part binding to the functional cassette.

| Gene                                   | Direction | T <sub>m</sub> (°C) | Sequence (5' → 3')                                                                               | function                                  |
|----------------------------------------|-----------|---------------------|--------------------------------------------------------------------------------------------------|-------------------------------------------|
| <b>SOD_c01380</b><br>( <i>cya</i> )    | sense     | 65                  | GAGACTGGATGCGATCAACC                                                                             | gene specific primers                     |
|                                        | antisense | 67                  | CCCGTTCGATCTTCCAGTTG                                                                             |                                           |
|                                        | sense     | 62                  | CCCGCGTTTCAACGGGTATACAGTCTGCTGCCT<br>ACCTTACTGCACTACCAA <u>ATTAACCCTCACTAA</u><br><u>AGGGCGG</u> | primers for mutagenesis                   |
|                                        | antisense | 62                  | CAGGCGTGTAAGGCAAACGCCGTGGGGAAC<br>GTTACCGTTCAGATAGCCCTAATACGACTCACT<br><u>ATAGGGCTC</u>          |                                           |
| <b>SOD_c43810</b><br>( <i>crp</i> )    | sense     | 71                  | TCTCGGCAAACCGCAAACAG                                                                             | gene specific primers                     |
|                                        | antisense | 67                  | CGTGAACAACCGACGATCTG                                                                             |                                           |
|                                        | sense     | 62                  | GCTCCGTCGCGGTGCTGATTAAGATGAAGAG<br>GGTAAAGAGATGATCCTGA <u>ATTAACCCTCACT</u><br><u>AAAGGGCGG</u>  | primers for mutagenesis                   |
|                                        | antisense | 62                  | CTGCGCTCCTGGCCTTCTCAAACAATCCAAGC<br>TCGCCGATGAAATCCCCTAATACGACTCACTAT<br><u>AGGGCTC</u>          |                                           |
| <b>5'UTR</b>                           | sense     | 64.5                | GATCCATCCGATTTGACACC                                                                             | 5'-UTR specific primers                   |
|                                        | antisense | 65                  | ATTCGATTGAGCATTGGGTG                                                                             |                                           |
| <b>CRE1::Km</b>                        | sense     | 62                  | GGGTATCGGTGAGCACGTAATATCATTGGGCT<br>AGCCGACCCCTTTGTTTCA <u>ATTAACCCTCACTA</u><br><u>AAGGGCGG</u> | primers for mutagenesis                   |
|                                        | antisense | 62                  | TGGGAGTTTTGCTAGGGTGCAACTATTTTTTGT<br>TAAAGCCAGGCGATGGATAATACGACTCACTA<br><u>TAGGGCTC</u>         |                                           |
| <b>CRE2::Km</b>                        | sense     | 62                  | ATTAAGTTAAACCATAAGTTAAAAATATATCA<br>CTCGCTGATACTTCATCAA <u>ATTAACCCTCACTA</u><br><u>AAGGGCGG</u> | primers for mutagenesis                   |
|                                        | antisense | 62                  | TGTCAAATTTTATTTAATGACGGTTTTTAAGAA<br>AAATAAATTAATCATGATAATACGACTCACTA<br><u>TAGGGCTC</u>         |                                           |
| <b>SOD_c20750</b><br>(terpene cyclase) | sense     | 65.5                | ATCCCTTCAACCGGCAGTAC                                                                             | gene specific primers                     |
|                                        | antisense | 64                  | CTGAAGCGGTATAAGCCAGC                                                                             |                                           |
| <b>16 S rRNA</b>                       | sense     | 62                  | AGAGTTTGATCATGGCTCAGA                                                                            | gene specific primers                     |
|                                        | antisense | 70                  | AGGTGATCCAACCGCAGGTTC                                                                            |                                           |
| <b>SOD_c38830</b><br>(GAPDH)           | sense     | 62                  | ACCTGTTGGACGCAGAGTAC                                                                             | gene specific primers                     |
|                                        | antisense | 64                  | GAGCGATCAGATCCAGAACC                                                                             |                                           |
| <b>Primer name</b>                     |           |                     |                                                                                                  |                                           |
| <b>Qo</b>                              | sense     | 61.5                | CCAGTGAGCAGAGTGACG                                                                               | primers for 5'-RACE-PCR                   |
| <b>Qi</b>                              | sense     | 61                  | GAGGACTCGAGCTCAAGC                                                                               |                                           |
| <b>Qt</b>                              | sense     | 48                  | CCAGTGAGCAGAGTGACGAGGACTCGAGCTCA<br>AGCTTTTTTTTTTTTTTTTTT                                        |                                           |
| <b>GSP1</b>                            | antisense | 69                  | CTTCTGTAAACGCCGCTGG                                                                              |                                           |
| <b>GSP2</b>                            | antisense | 73                  | ATGGCCGCAGCAACTGTTGG                                                                             |                                           |
| <b>pJet1-FP</b>                        | sense     | 59                  | ACTACTCGATGAGTTTTCGG                                                                             | Primers for sequencing (provided by GATC) |
| <b>pJet1-RP</b>                        | antisense | 57.5                | TGAGGTGGTTAGCATAGTTC                                                                             |                                           |



**Table S2: Protocol for Reverse Transcriptase PCR.**

| <b>Component</b>                                                                                                     | <b>Volume</b> |
|----------------------------------------------------------------------------------------------------------------------|---------------|
| RNA (DNaseI-digested)                                                                                                | 10 $\mu$ l    |
| antisense Primer (10 pmol/ $\mu$ l)                                                                                  | 2 $\mu$ l     |
| dNTPs (10 mM each)                                                                                                   | 1 $\mu$ l     |
| DEPC-H <sub>2</sub> O                                                                                                | 1.5 $\mu$ l   |
| 5 min, 65 °C, 1 min on ice                                                                                           |               |
| 5x RT-buffer (Thermo Fisher Scientific, Waltham, USA)                                                                | 4 $\mu$ l     |
| Ribolock (Thermo Fisher Scientific, Waltham, USA)                                                                    | 0.5 $\mu$ l   |
| Maxima Reverse Transcriptase (Thermo Fisher Scientific, Waltham, USA) or<br>DEPC-H <sub>2</sub> O (negative control) | 0.4 $\mu$ l   |
| DEPC-H <sub>2</sub> O                                                                                                | 0.6 $\mu$ l   |
| <b>Amplification conditions</b>                                                                                      |               |
| 30 min, 50 °C                                                                                                        |               |
| 5 min 85 °C                                                                                                          |               |
| 1 min on ice                                                                                                         |               |

**Table S3: Protocol for DIG-labelling of Northern blot probes.** X = annealing temperature specific for the primers used.

| <b>Component</b>                                                 | <b>Volume</b>  |
|------------------------------------------------------------------|----------------|
| 10x Taq buffer                                                   | 5 $\mu$ l      |
| sense Primer                                                     | 2 $\mu$ l      |
| antisense Primer                                                 | 2 $\mu$ l      |
| dATP, dCTP, dGTP (10 mM each)                                    | each 1 $\mu$ l |
| dTTP (1 mM)                                                      | 6.5 $\mu$ l    |
| DIG-dUTP (Roche Diagnostics Deutschland GmbH, Mannheim, Germany) | 1 $\mu$ l      |
| Taq polymerase                                                   | 1 $\mu$ l      |
| DNA template                                                     | 1 $\mu$ l      |
| <b>Amplification conditions</b>                                  |                |
| 2 min 95 °C                                                      |                |
| 30 s 95 °C                                                       |                |
| 30 s x °C                                                        |                |
| 1 min 72 °C                                                      |                |
| 7 min 72 °C                                                      |                |
| ∞ 10 °C                                                          |                |

} 40 cycles
